# Supplementary material for: Boundary layer moisture variability at the ARM Eastern North Atlantic Observatory
Source: Copernicus journal article supplement (doi:10.5194/acp-2022-615), 2022-09-01
Supplement: Supplementary file 1 [file acp-2022-615-supplement.pdf]

## Supplemental Material

5

| H (m)   | LWP/LWP <sub>ad</sub>      |                             |
|---------|----------------------------|-----------------------------|
|         | LWP > 100 g/m <sup>2</sup> | 50<LWP<100 g/m <sup>2</sup> |
| 200-300 | -                          | 1.0 ±0.2                    |
| 300-400 | 1.1±0.2                    | 0.8±0.2                     |
| 400-500 | 0.9±0.2                    | 0.6±0.2                     |
| 500-600 | 0.8±0.3                    | 0.3±0.1                     |
| 600-700 | 0.6±0.2                    | 0.2± 0.1                    |
| 700-800 | 0.5±0.2                    | -                           |

10

15

**Table S1: Adiabaticity of sampled clouds and geometrical thickness (H)**

20

25

30

|     | $\frac{\partial \hat{h}}{\partial t}$ | $\mathbf{v} \cdot \nabla \hat{h}$ | $\omega_s$ | $\omega_e$ |
|-----|---------------------------------------|-----------------------------------|------------|------------|
| Jan | 1.5±2.7                               | -0.7±2.5                          | -3.4 ± 2.2 | 4.1 ± 4.2  |
| Feb | 1.2±3.2                               | -1.4±2.2                          | -3.4 ± 1.9 | 3.2± 4.4   |
| Mar | 0.9±3.5                               | -0.8±2.2                          | -3.6 ± 2.0 | 3.7 ± 4.6  |
| Apr | 0.1±3.4                               | -0.9±2.2                          | -3.2 ± 1.9 | 2.4 ± 4.6  |
| May | 0.1±3.8                               | -1.0±2.4                          | -3.5 ± 1.9 | 2.6 ± 4.9  |
| Jun | 0.4±3.6                               | -0.8±2.1                          | -2.8 ± 1.8 | 2.5 ± 4.4  |
| Jul | 0.2±3.2                               | -0.7±1.9                          | -2.2 ± 1.7 | 1.7 ± 4.0  |
| Aug | 0.4±3.5                               | -1.3±2.1                          | -2.7 ± 1.8 | 1.8 ± 4.4  |
| Sep | 0.4±3.7                               | -1.1±2.3                          | -3.5 ± 1.9 | 2.7 ± 4.8  |
| Oct | 0.7±3.4                               | -1.1±2.2                          | -3.5 ± 1.9 | 3.1 ± 4.6  |
| Nov | 0.7±3.4                               | -1.2±2.2                          | -3.4 ± 2.0 | 2.9 ± 4.5  |
| Dec | 0.4±3.5                               | -1.4±2.3                          | -3.2 ± 1.9 | 2.2 ± 4.7  |

**Table S2: Monthly averages and standard deviation of the components of the mass budget in (3). All values are reported here in mm s<sup>-1</sup>.**

50

55

|            |
|------------|
| 2017/03/16 |
| 2017/03/17 |
| 2018/08/05 |
| 2018/09/04 |
| 2019/03/31 |
| 2019/04/04 |
| 2019/06/04 |
| 2019/06/08 |
| 2019/06/25 |
| 2019/06/26 |

60

65

**Table S3: List of cases used in Section 5.**

70

75

80

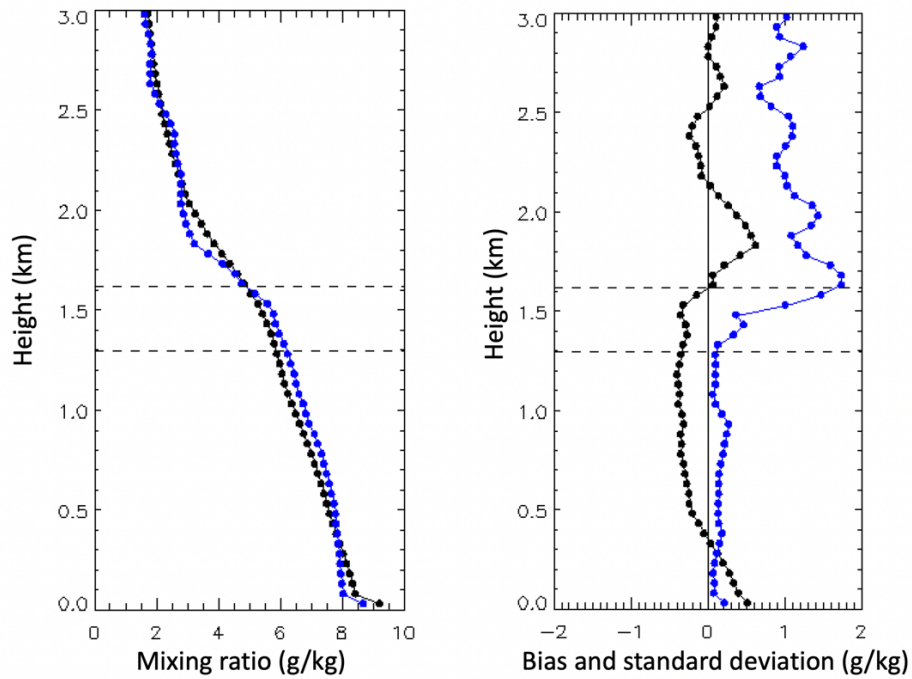

Figure S1: Average profile of mixing ratio from radiosondes (blue) and Raman lidar (black). (b) Bias (black) and standard deviation (blue) of the differences between retrieved and radiosondes mixing ratio. The horizontal dashed lines indicate average cloud base and cloud top during the selected cases.
